# Supplementary material for: Inflammatory-stimuli-responsive turn-on NIR fluorogenic theranostic prodrug: adjuvant delivery of diclofenac and hydrogen sulfide attenuates acute inflammatory disorders
Source: Royal Society of Chemistry journal article supplement (doi:10.1039/d3tb02552g), 2024-01-01
Supplement: d3tb02552g1.pdf [file d3tb02552g1.pdf]

**Supplementary Information**

**for**

**Inflammatory-stimuli-responsive turn-on NIR fluorogenic theranostic  
prodrug: adjuvant delivery of diclofenac and hydrogen sulfide attenuates  
acute inflammatory disorders**

## Contents

| SI No. | Contents                                                                                                                                                                                        | Page No. |
|--------|-------------------------------------------------------------------------------------------------------------------------------------------------------------------------------------------------|----------|
| 1      | Experimental procedure for the synthesis of <b>13a</b>                                                                                                                                          | S3-S4    |
| 2      | Chemical structures of the reported turn-on fluorogenic prodrugs of NSAIDs                                                                                                                      | S4       |
| 3      | Emission spectral pattern of <b>DCF-HS</b> with the variation of H <sub>2</sub> O <sub>2</sub> concentration and the determination of the limit of detection (LOD) of the prodrug <b>DCF-HS</b> | S5       |
| 4      | HPLC kinetics for the reaction progress of <b>DCF-HS</b> and H <sub>2</sub> O <sub>2</sub>                                                                                                      | S6       |
| 5      | ESI-MS spectrum of the intermediates <b>10-12</b>                                                                                                                                               | S6-S7    |
| 6      | HPLC chromatogram of <b>13a</b> and the reaction mixture of <b>DCF-HS</b> and H <sub>2</sub> O <sub>2</sub>                                                                                     | S8       |
| 7      | HPLC chromatogram showing the reactivity of <b>DCF-HS</b> towards esterases                                                                                                                     | S8       |
| 8      | Fluorescence microscopy images of HeLa cells with <b>WSP2</b> for estimating the endogenous level of H <sub>2</sub> S                                                                           | S9       |
| 9      | Fluorescence emission studies for the detection of released H <sub>2</sub> S from <b>DCF-HS</b> + H <sub>2</sub> O <sub>2</sub> + CA using <b>WSP2</b>                                          | S9       |
| 10     | Fluorescence emission studies for monitoring the reactivity of <b>DCI-NH<sub>2</sub></b> with Na <sub>2</sub> S.9H <sub>2</sub> O                                                               | S10      |
| 11     | Image of Ponceau-S staining and uncropped raw Western Blots                                                                                                                                     | S10      |
| 12     | Rat paw edema images of normal control groups at zero hour                                                                                                                                      | S11      |
| 13     | IVIS images in 3D in the trans-fluorescence mode for estimating the fluorescence emission from <b>DCF-HS</b> in rat model                                                                       | S11-S12  |
| 14     | NMR spectroscopic data of all the intermediates and products                                                                                                                                    | S13-S24  |
| 15     | References                                                                                                                                                                                      | S25      |

## Synthesis of the by-product 13a

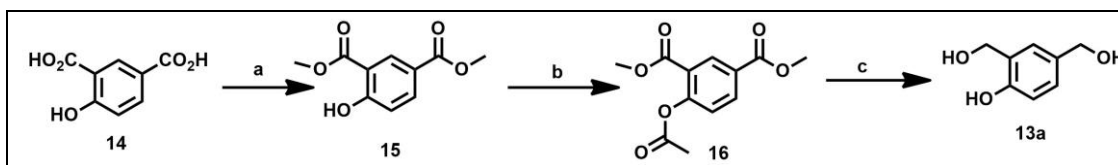

**Scheme 1.** Synthetic scheme to compound **13a**. Reagents and conditions: (a) Methanol, DCC, DMAP, dry DCM, 0 °C - RT, 5 h; (b) Acetyl chloride, pyridine, dry DCM, 0 °C - RT, 6 h; (c) LiAlH<sub>4</sub>, dry THF, 0 °C - RT, 14 h.

## Synthesis of compound 15<sup>1</sup>

Compound **15** was synthesized following the literature procedure with a minor modifications.<sup>2</sup> To a mixture of 4-hydroxyisophthalic acid **14** (0.10 g, 0.55 mmol) and DMAP (7.00 mg, 0.06 mmol) was added dry DCM (3 mL) under an inert atmosphere. Methanol (0.09 mL, 2.20 mmol) was added to the reaction mixture and cooled to 0 °C. A solution of DCC in dry DCM (3 mL) was added under inert conditions at 0 °C. The reaction mixture was slowly brought to room temperature and stirred for 5 h. The progress of the reaction was monitored by TLC analysis. Upon completion, the reaction mixture was diluted with DCM and washed with water (3 × 5 mL). The organic layer was dried over anhydrous sodium sulfate, the solvent was evaporated under reduced pressure, and the crude compound was purified by silica gel (100-200 mesh) column chromatography using 20% ethyl acetate in pet. ether as a mobile phase to afford the pure product **15** as a light brown solid.  $R_f = 0.7$  (20% ethyl acetate in pet. ether); yield: 0.11 g (90%). <sup>1</sup>H NMR (400 MHz, CDCl<sub>3</sub>)  $\delta$  (ppm) = 11.21 (s, 1H), 8.57 (s, 1H), 8.12 (d,  $J = 5.6$  Hz, 1H), 7.02 (d,  $J = 5.6$  Hz, 1H), 3.99 (s, 3H), 3.91 (s, 3H). <sup>13</sup>C NMR (150 MHz, CDCl<sub>3</sub>)  $\delta$  (ppm) = 169.1, 165.0, 164.1, 135.6, 131.5, 120.4, 116.8, 111.1, 51.6, 51.1.

## Synthesis of compound 16<sup>1</sup>

Compound **16** was synthesized following the literature method with a minor modifications.<sup>3</sup> To a stirred solution of compound **15** (0.05 g, 0.24 mmol) in dry DCM (3 mL) was added pyridine (0.04 mL, 0.48 mmol) under an inert atmosphere and cooled to 0 °C. After 10 min, acetyl chloride (0.03 mL, 0.48 mmol) was added dropwise. The reaction mixture was slowly brought to room temperature and stirred for 6 h. The progress of the reaction was monitored by TLC analysis. Upon completion, the organic solvent was evaporated under reduced pressure and the crude compound was purified by silica gel (100-200 mesh) column chromatography using 20% ethyl acetate in pet. ether as a mobile phase to afford the pure product **16** as a colourless liquid.

$R_f = 0.5$  (20% ethyl acetate in pet. ether); yield: 0.04 g (66%).  $^1\text{H NMR}$  (400 MHz,  $\text{CDCl}_3$ )  $\delta$  (ppm) = 8.68 (d,  $J = 2.2$  Hz, 1H), 8.22 (dd,  $J_1 = 8.4$  Hz,  $J_2 = 2.2$  Hz, 1H), 7.19 (d,  $J = 8.4$  Hz, 1H), 3.94 (s, 3H), 3.90 (s, 3H), 2.37 (s, 3H).  $^{13}\text{C NMR}$  (150 MHz,  $\text{CDCl}_3$ )  $\delta$  (ppm) = 168.2, 164.5, 163.1, 153.1, 133.9, 132.3, 127.1, 123.2, 122.3, 51.5, 51.4, 19.9.

### Synthesis of compound **13a**<sup>1</sup>

The compound **13a** was synthesized following the literature procedure with slight modifications.<sup>4</sup> To a stirred solution of compound **16** (0.05 g, 0.20 mmol) in dry THF (4 mL) was added lithium aluminium hydride (LAH) (0.08 g, 2.00 mmol) at 0 °C under an inert atmosphere. The reaction mixture was allowed to attain room temperature and stirred for 14 h. The progress of the reaction was monitored by TLC analysis. Upon completion, 2N HCl (5 mL) was added slowly to the reaction mixture at ice-cold conditions to quench the reaction. The solvent was evaporated under reduced pressure and the residue was extracted with ethyl acetate. The organic layer was dried over anhydrous sodium sulfate, the solvent was evaporated under reduced pressure, and the crude compound was purified by silica gel (100-200 mesh) column chromatography using 70% ethyl acetate in pet. ether as a mobile phase to afford the pure product **13a** as a light brown liquid.  $R_f = 0.4$  (70% ethyl acetate in pet. ether); yield: 0.02 g (64%).  $^1\text{H NMR}$  (400 MHz,  $\text{CD}_3\text{OD}$ )  $\delta$  (ppm) = 7.26 (d,  $J = 2.3$  Hz, 1H), 7.09 (dd,  $J_1 = 8.1$  Hz,  $J_2 = 2.3$ , 1H), 6.74 (d,  $J = 8.2$ , 1H), 4.64 (s, 2H), 4.49 (s, 2H).  $^{13}\text{C NMR}$  (150 MHz,  $\text{CD}_3\text{OD}$ )  $\delta$  (ppm) = 155.9, 133.6, 129.0, 128.9, 128.8, 116.0, 65.5, 61.3.

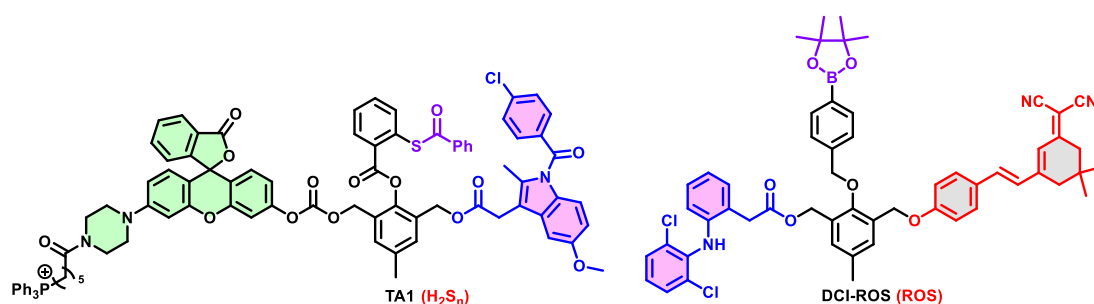

**Figure S1.** Chemical structures of the turn-on fluorogenic prodrugs of NSAIDs (**TA1** and **DCI-ROS**). The triggering bio-analyte is highlighted in the parenthesis, besides the names of the prodrugs.

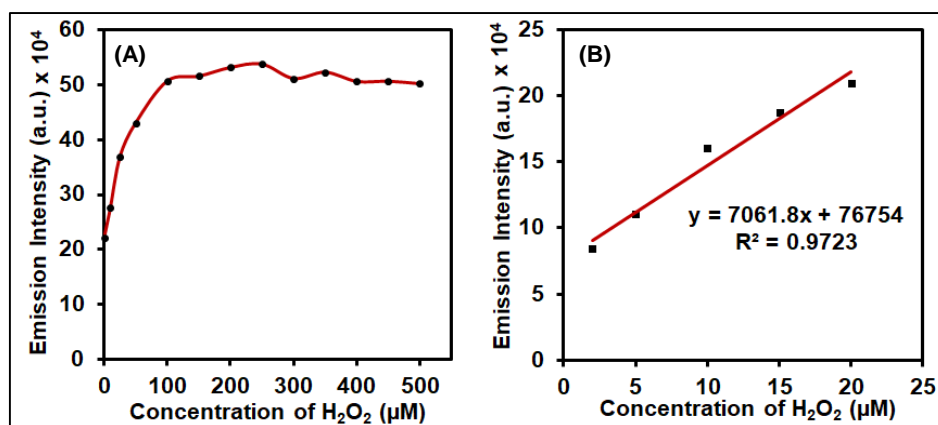

**Figure S2.** (A) Emission spectra of **DCF-HS** (5 μM) at 655 nm with varying concentration of H<sub>2</sub>O<sub>2</sub> (0 - 500 μM); (B) Emission spectra of **DCF-HS** (5 μM) with variable concentration of H<sub>2</sub>O<sub>2</sub> (0 - 20 μM) and with a fixed incubation time of 10 h for calculating the LOD of **DCF-HS** towards H<sub>2</sub>O<sub>2</sub>.

**Table S1.** Calculation of standard deviation ( $\sigma$ ) of blank measurements of **DCF-HS** (5 μM).

| Entry         | Emission Intensity (a.u.) at 655 nm | Entry                      | Emission Intensity (a.u.) at 655 nm |
|---------------|-------------------------------------|----------------------------|-------------------------------------|
| 1             | 116428.8                            | 6                          | 114219.3                            |
| 2             | 118941                              | 7                          | 119912.5                            |
| 3             | 115221.9                            | 8                          | 114553.3                            |
| 4             | 111025.9                            | 9                          | 116177.6                            |
| 5             | 110218                              | 10                         | 114131.3                            |
| Mean = 115083 |                                     | SD ( $\sigma$ ) = 2886.139 |                                     |

$$\text{LOD} = 3\sigma/K = 3 \times 2886.13 / 7061.8 = 1.2 \mu\text{M}$$

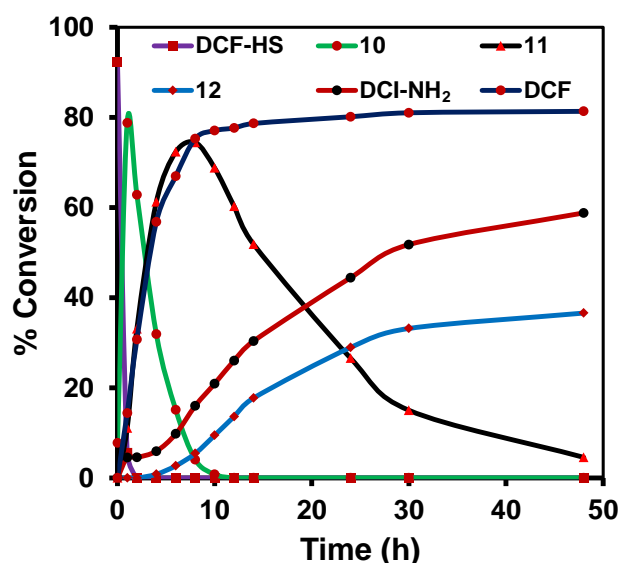

**Figure S3.** Progress of the reaction of **DCF-HS** (50  $\mu$ M) with  $\text{H}_2\text{O}_2$  (2 mM) over 48 h. Relative peak areas of compounds such as **DCF-HS**, **10**, **11**, **12**, **DCF**, and **DCI-NH<sub>2</sub>** in the reaction mixture were monitored to determine %conversion. The peak area of **DCF-HS**, **10**, **11**, **12**, and **DCI-NH<sub>2</sub>** were measured at 400 nm, and the peak area of **DCF** was measured at 280 nm.

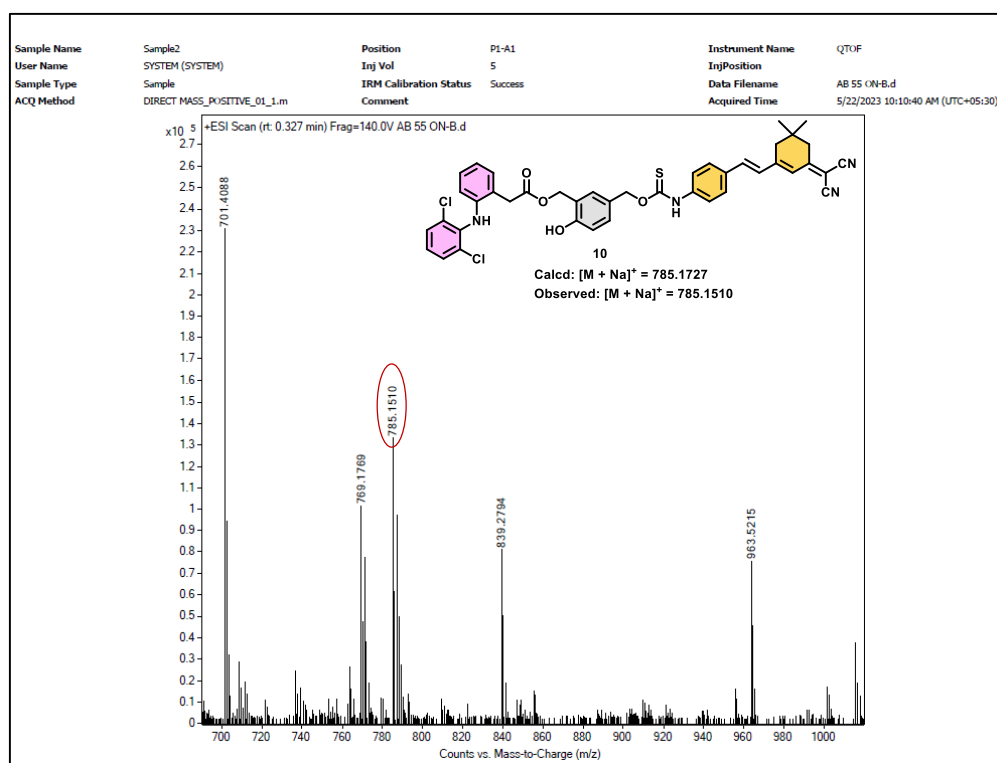

**Figure S4.** ESI-MS spectrum of the intermediate **10** in the reaction mixture of prodrug **DCF-HS** with  $\text{H}_2\text{O}_2$  during HPLC analysis. ESI-MS (+ve)  $m/z$  calcd for  $\text{C}_{42}\text{H}_{36}\text{Cl}_2\text{N}_4\text{NaO}_4\text{S}$   $[\text{M} + \text{Na}]^+ = 785.1727$ ; obs = 785.1510.

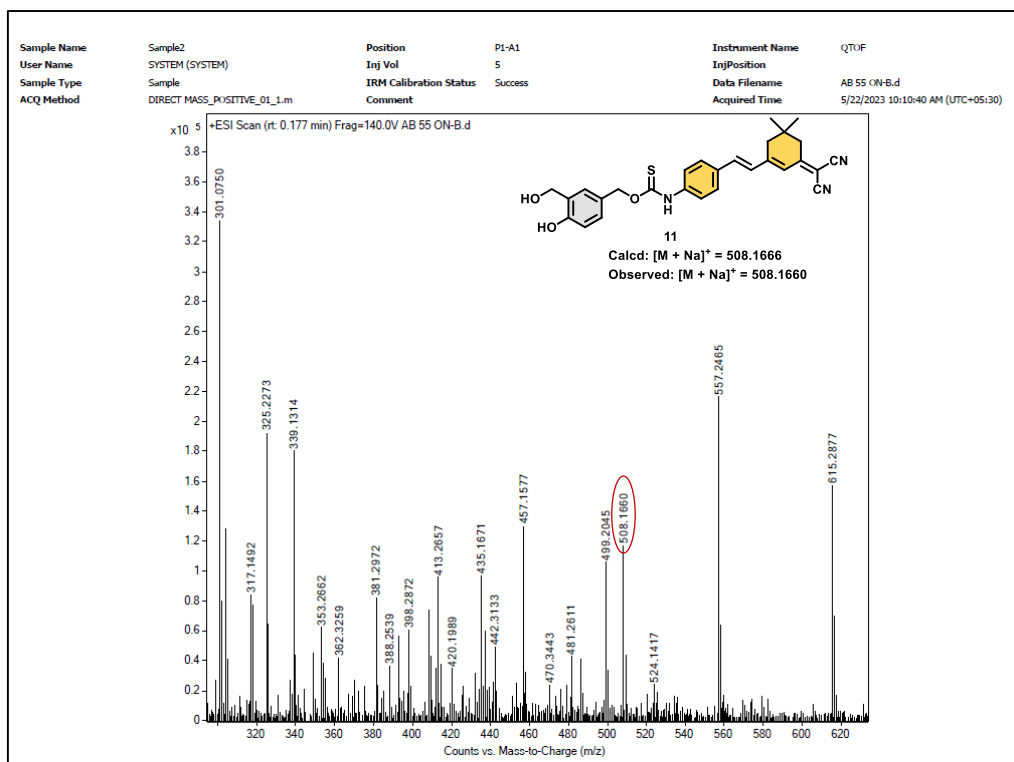

**Figure S5.** ESI-MS spectrum of the intermediate **11** in the reaction mixture of prodrug **DCF-HS** with  $H_2O_2$  during HPLC analysis. ESI-MS (+ve)  $m/z$  calcd for  $C_{28}H_{27}N_3NaO_3S$   $[M + Na]^+ = 508.1666$ ; obs = 508.1660.

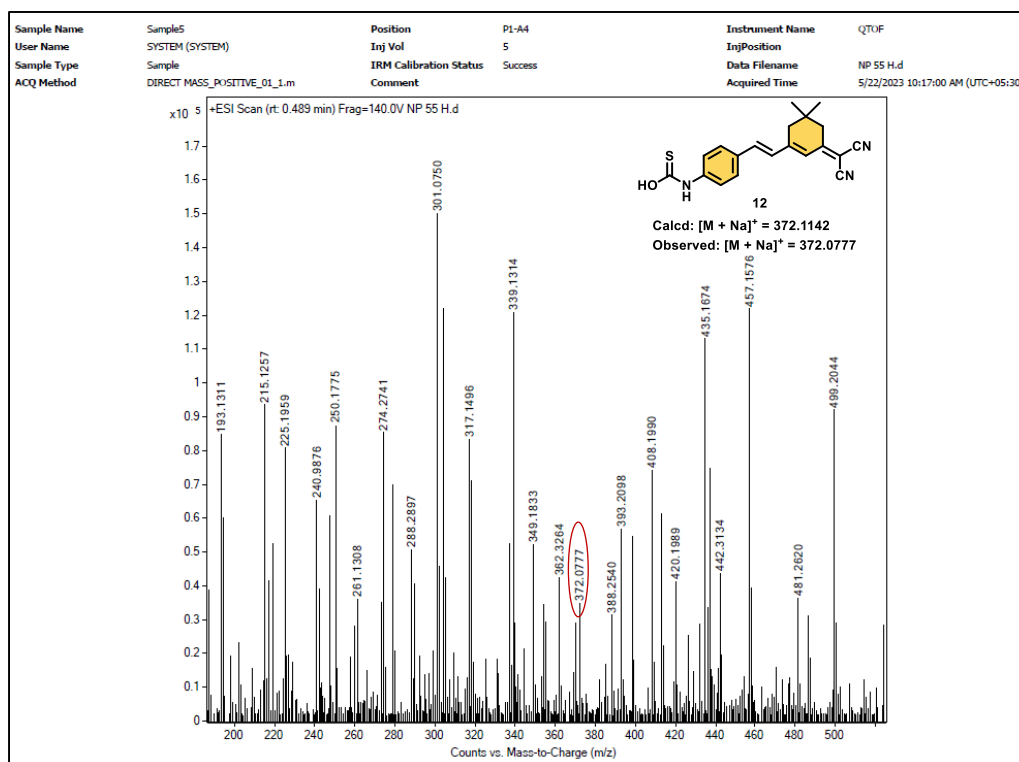

**Figure S6.** ESI-MS spectrum of the intermediate **12** in the reaction mixture of prodrug **DCF-HS** with  $\text{H}_2\text{O}_2$  during HPLC analysis. ESI-MS (+ve)  $m/z$  calcd for  $\text{C}_{20}\text{H}_{19}\text{N}_3\text{NaOS}$   $[\text{M} + \text{Na}]^+ = 372.1142$ ; obs = 372.0777.

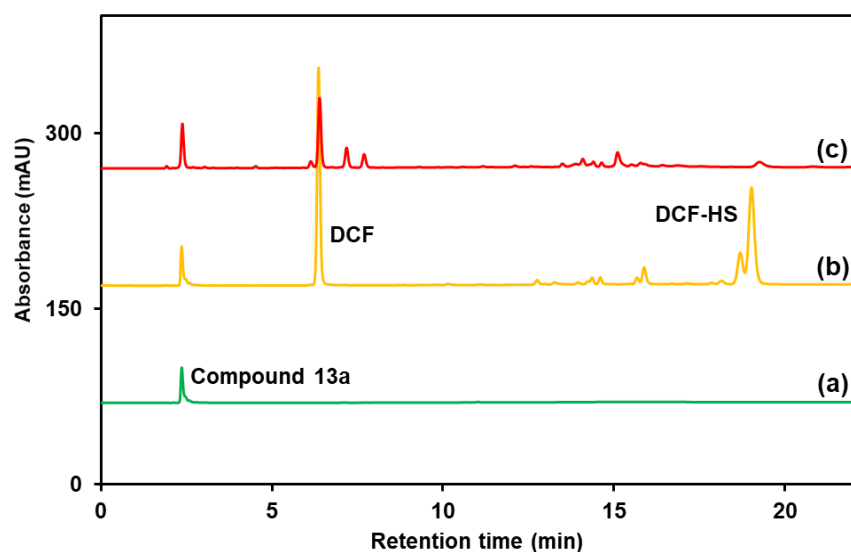

**Figure S7.** HPLC chromatograms for the reaction of **DCF-HS** ( $50 \mu\text{M}$ ) with  $\text{H}_2\text{O}_2$  ( $2.5 \text{ mM}$ ) and the release of by-product **13a**; Lanes: (a) pure compound **13a** ( $50 \mu\text{M}$ ,  $280 \text{ nm}$ ); (b) Mixture of pure **DCF-HS**, **DCF**, and compound **13a** ( $280 \text{ nm}$ ); (c) **DCF-HS** +  $\text{H}_2\text{O}_2$  ( $t = 12 \text{ h}$ ,  $280 \text{ nm}$ ).

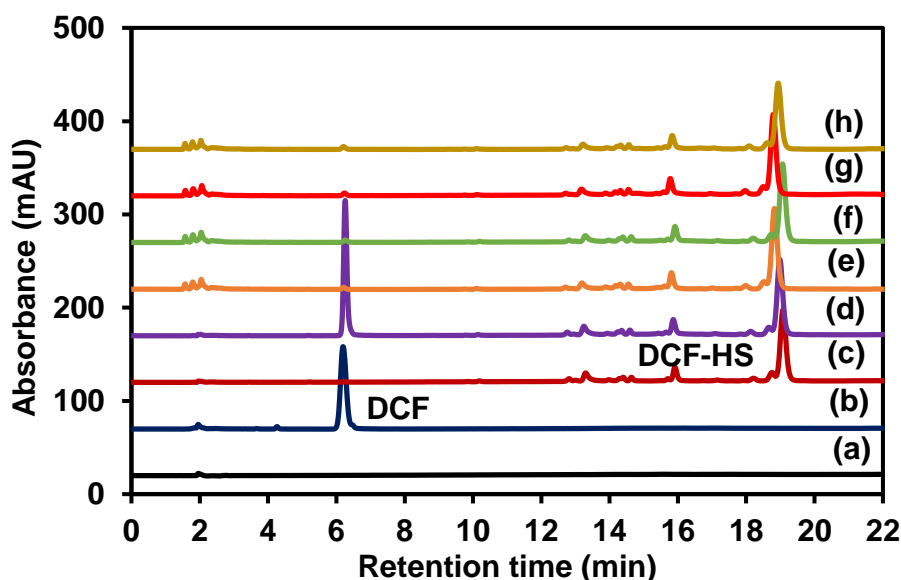

**Figure S8.** Reverse-phase HPLC chromatograms for the reaction of **DCF-HS** ( $50 \mu\text{M}$ ) with esterase ( $5 \text{ U/mL}$ ); Lanes: (a) PBS ( $\text{pH} = 7.4$ ,  $254 \text{ nm}$ ); (b) pure **DCF** ( $50 \mu\text{M}$ ,  $280 \text{ nm}$ ); (c) pure **DCF-HS** ( $50 \mu\text{M}$ ,  $280 \text{ nm}$ ); (d) **DCF-HS** and **DCF** ( $50 \mu\text{M}$ ,  $280 \text{ nm}$ ); (e) **DCF-HS** + Esterase ( $t = 2 \text{ h}$ ,  $280 \text{ nm}$ ); (f) **DCF-HS** + Esterase ( $t = 6 \text{ h}$ ,  $280 \text{ nm}$ ); (g) **DCF-HS** + Esterase ( $t = 10 \text{ h}$ ,  $280 \text{ nm}$ ); (h) **DCF-HS** + Esterase ( $t = 24 \text{ h}$ ,  $280 \text{ nm}$ ).



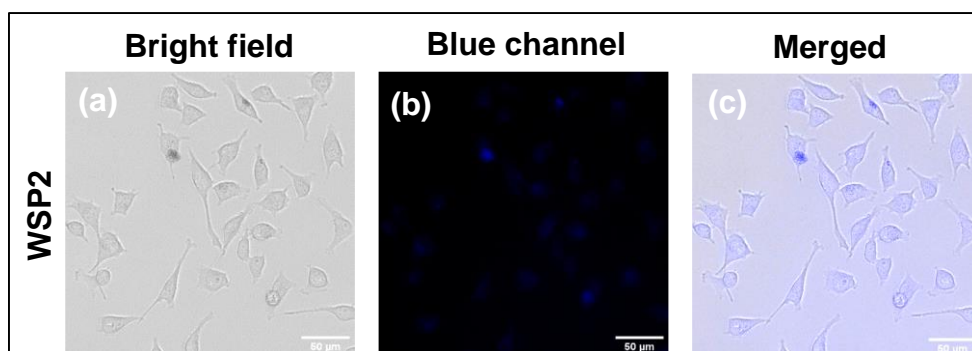

**Figure S9.** Fluorescence microscopy images (bright field, blue channel, and merged) of HeLa cells for the H<sub>2</sub>S-selective turn-on fluorogenic probe **WSP2** (5 μM) for estimating the endogenous level of H<sub>2</sub>S in HeLa cells. Scale bar: 50 μm.

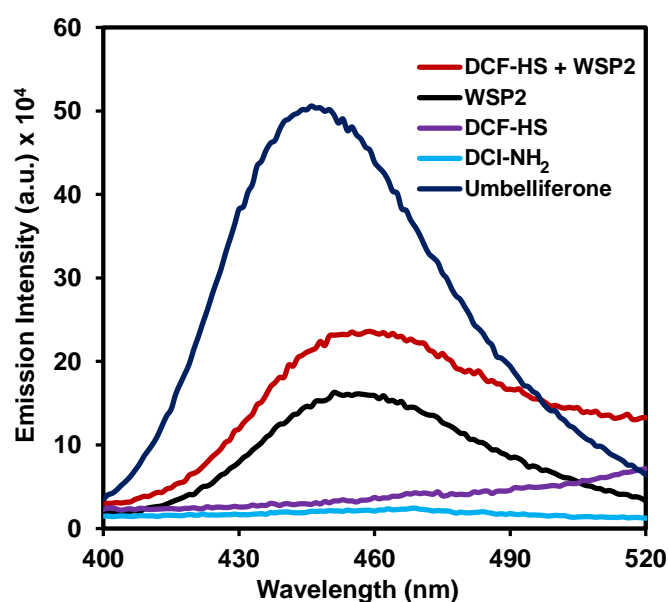

**Figure S10.** Fluorescence emission studies for detecting released H<sub>2</sub>S from **DCF-HS** using the H<sub>2</sub>S-selective probe **WSP2**. The prodrug **DCF-HS** (50 μM) was treated with **WSP2** (10 μM) in the presence of H<sub>2</sub>O<sub>2</sub> (100 μM) and CA (50 μg/mL) in PBS (20 mM, pH = 7.4, with 2% DMSO, v/v) with an incubation of 12 h. The excitation wavelength was 322 nm with a slit width = 3/3. The emission intensity of pure **WSP2** (10 μM), umbelliferone (0.08 μM), and **DCI-NH<sub>2</sub>** (50 μM) was measured under identical conditions.

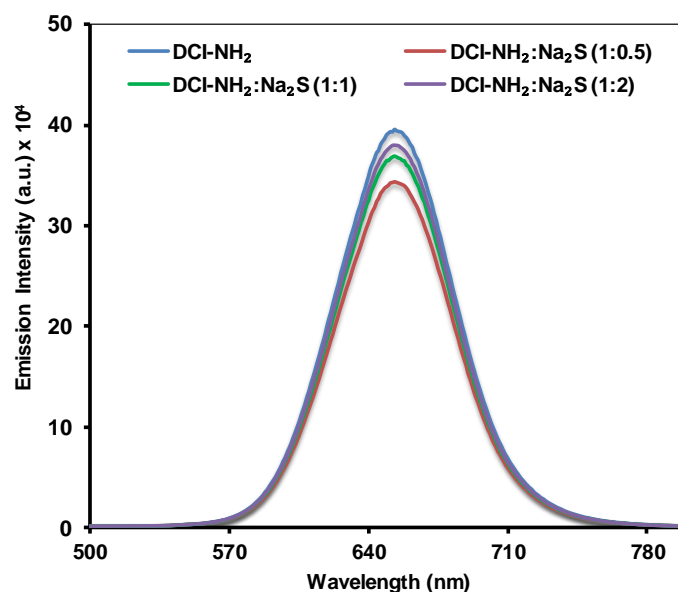

**Figure S11.** Fluorescence emission of **DCI-NH<sub>2</sub>** (5 μM) in the absence and presence of a variable concentration (2.5, 5, and 10 μM) of Na<sub>2</sub>S.9H<sub>2</sub>O. The emission intensity was measured in PBS: DMSO system (1:1) after incubation for 60 min.

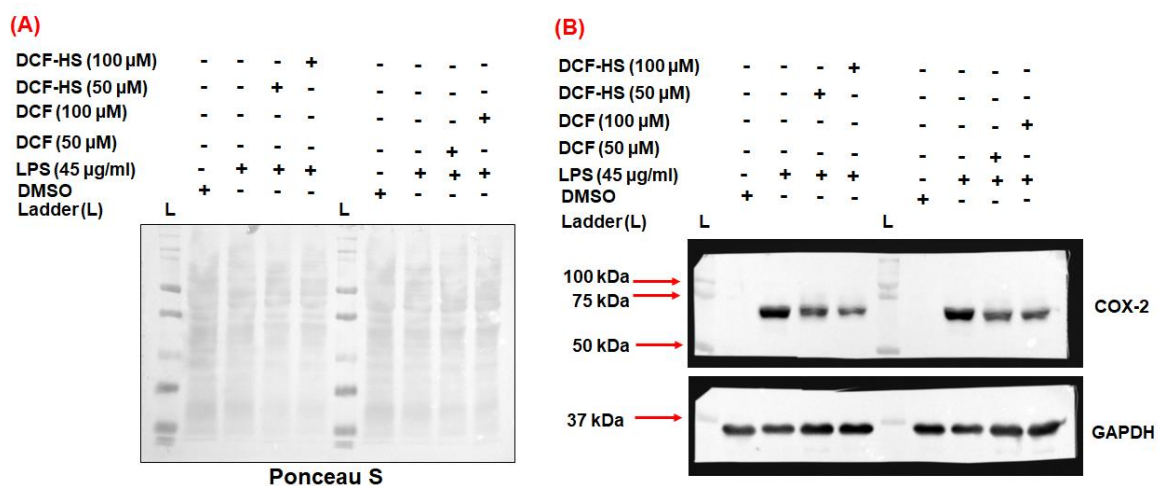

**Figure S12.** (A) Image of Ponceau S staining confirming the transfer of proteins on the nitrocellulose membrane from 12% SDS-PAGE gel before the final western blot images. (B) Uncropped raw Western blots for estimating COX-2 and GAPDH levels expression in LPS-induced macrophage cells (RAW 264.7) in the presence of **DCF-HS** and **DCF**.

### Normal control (NC)

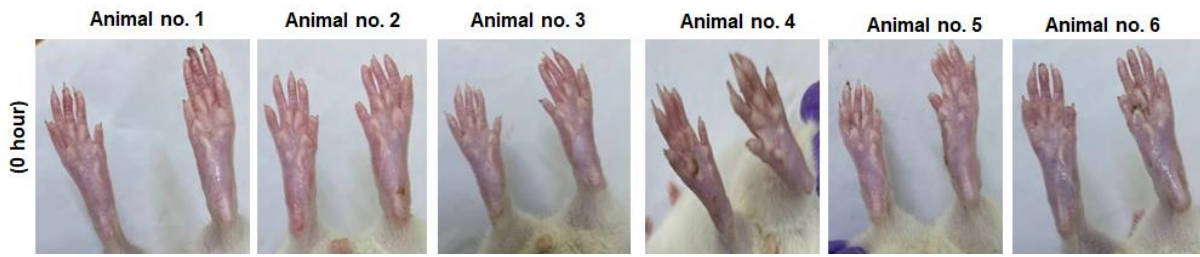

**Figure S13.** Image of the hind paw of the normal control (NC) group animals at 0 h.

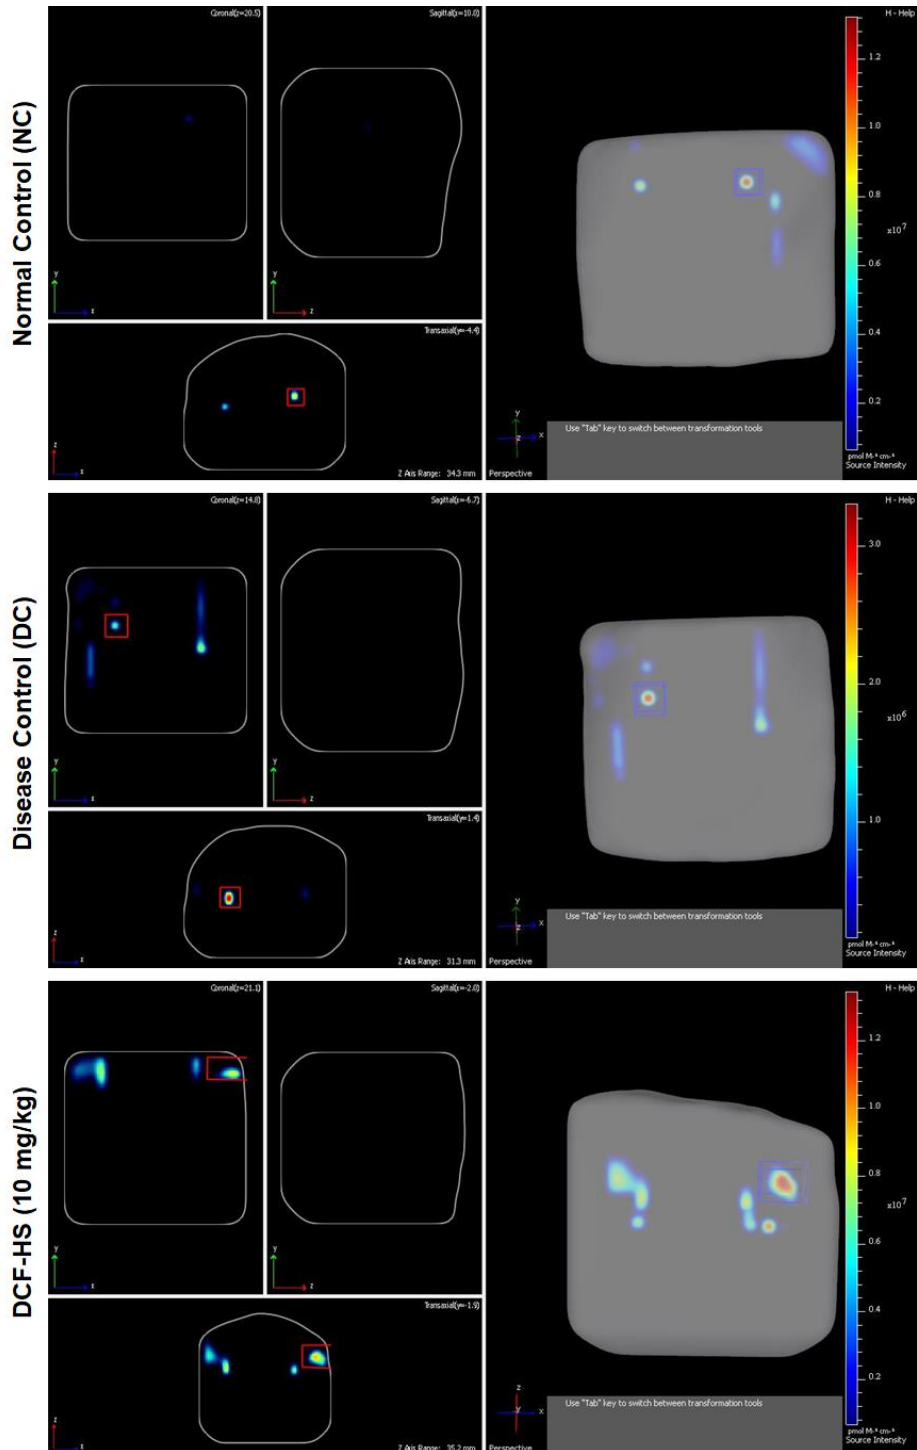

**Figure S14.** IVIS imaging in 3D in the trans-fluorescence mode to estimate released fluorescence intensity from **DCF-HS** compared to normal control and disease control Ex/Em: 480/660 nm.

## NMR spectra of the synthesized compounds

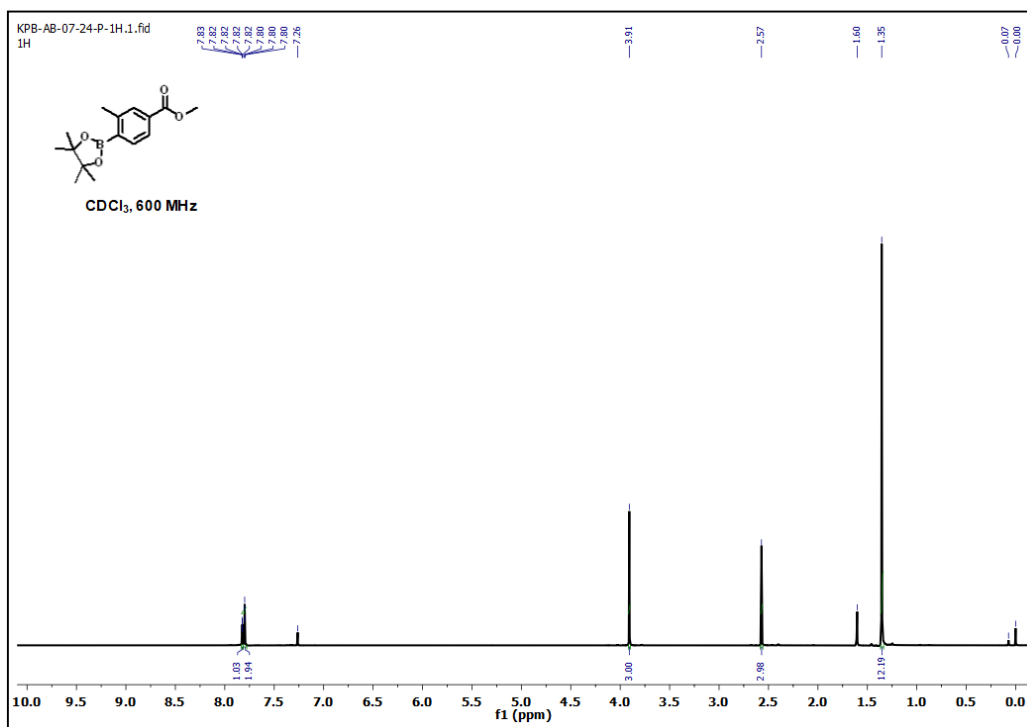

Figure S15. <sup>1</sup>H NMR spectrum (CDCl<sub>3</sub>, 600 MHz) of compound 2.

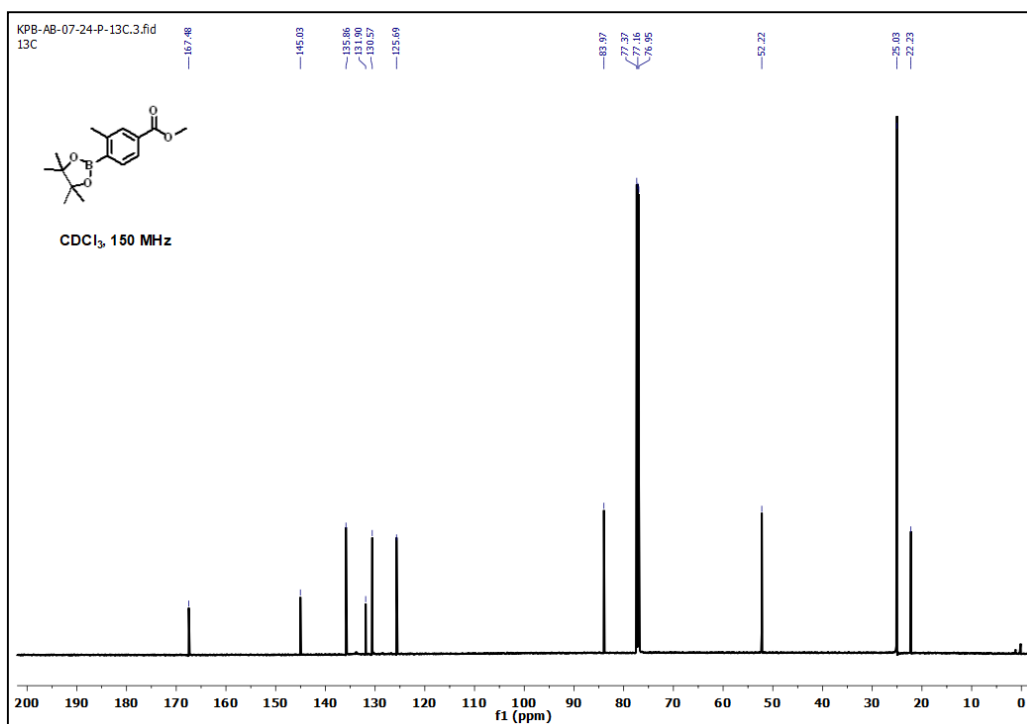

Figure S16. <sup>13</sup>C NMR spectrum (CDCl<sub>3</sub>, 150 MHz) of compound 2.

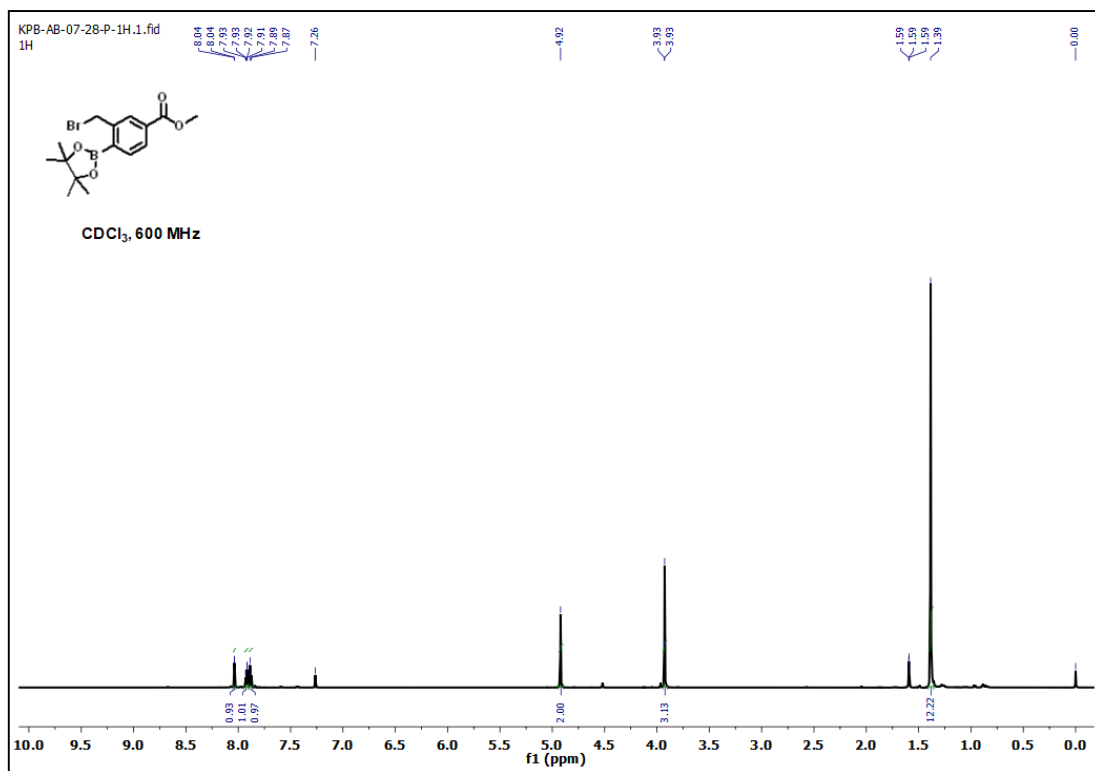

Figure S17. <sup>1</sup>H NMR spectrum (CDCl<sub>3</sub>, 600 MHz) of compound 3.

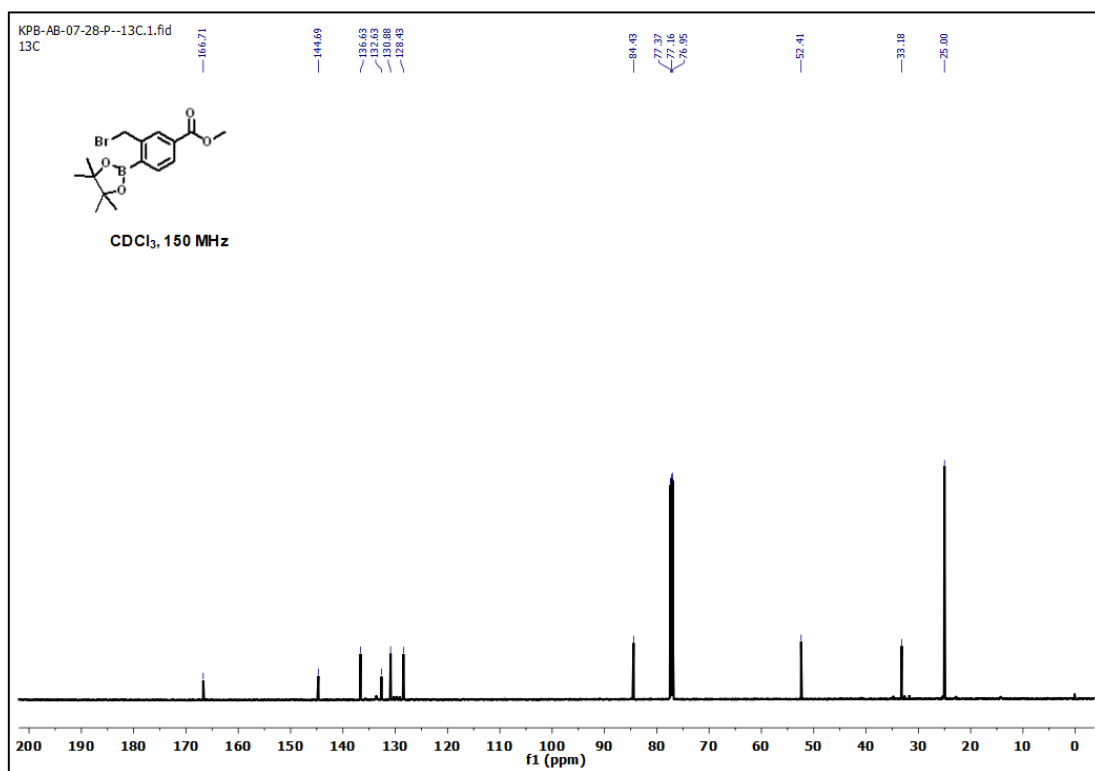

Figure S18. <sup>13</sup>C NMR spectrum (CDCl<sub>3</sub>, 150 MHz) of compound 3.

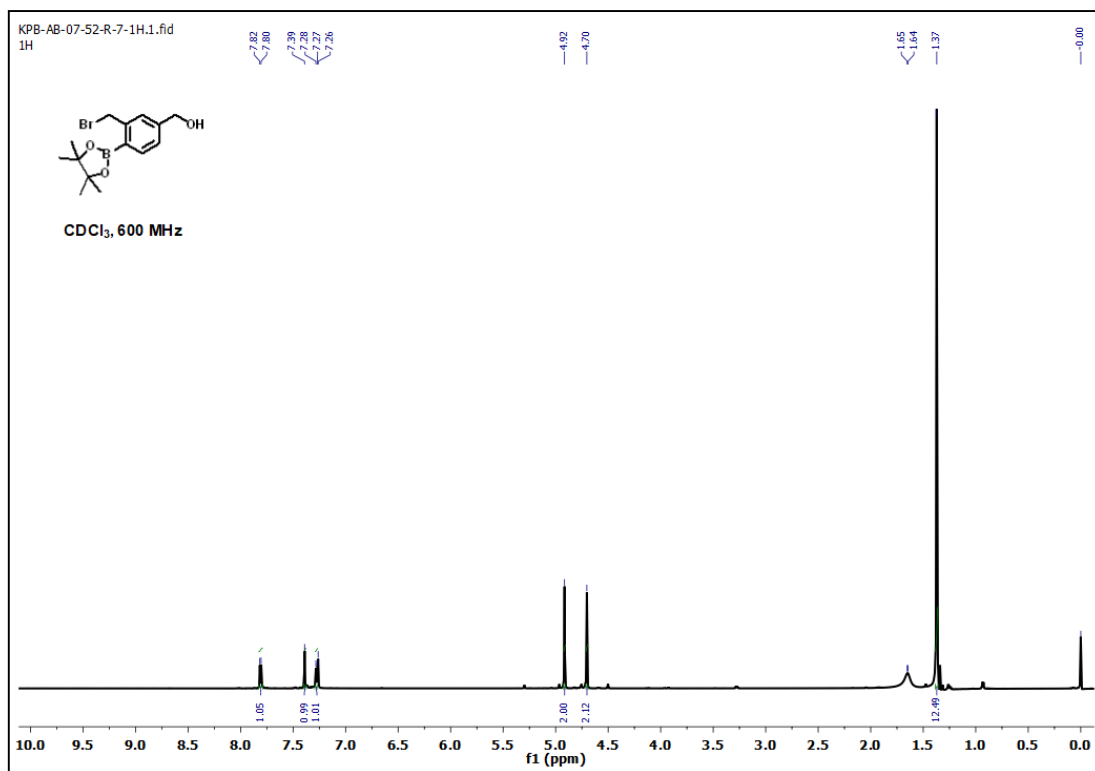

Figure S19. <sup>1</sup>H NMR spectrum (CDCl<sub>3</sub>, 600 MHz) of compound 4.

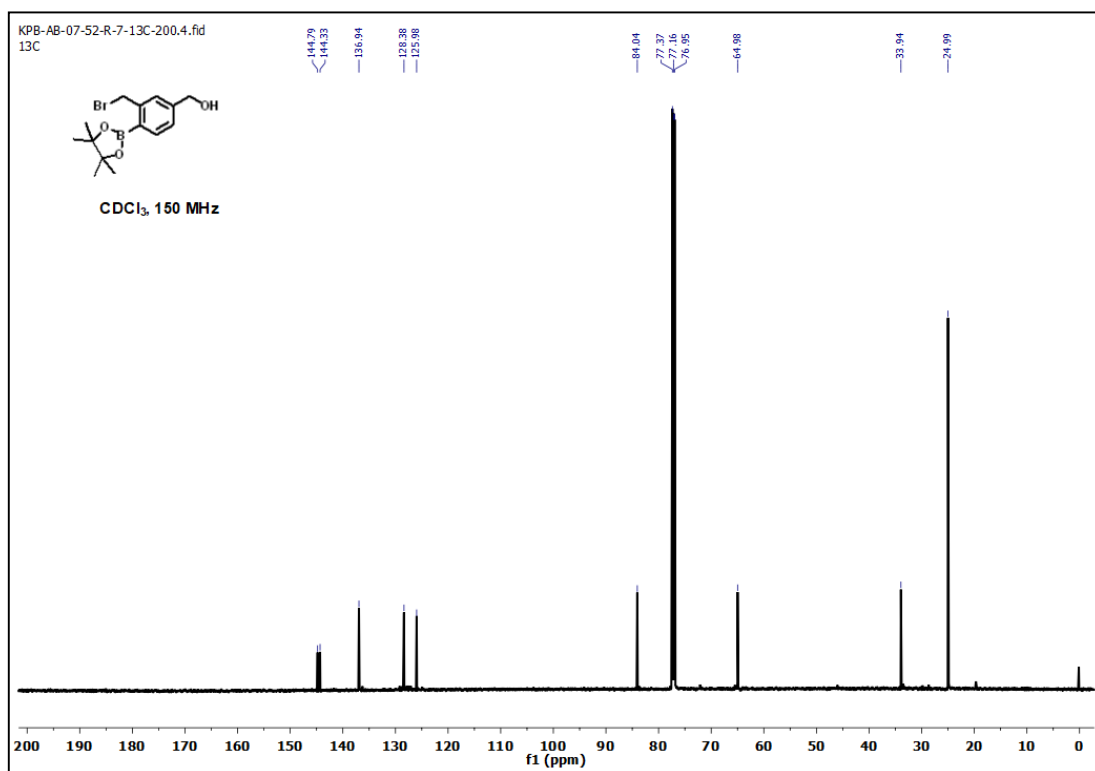

Figure S20. <sup>13</sup>C NMR spectrum (CDCl<sub>3</sub>, 150 MHz) of compound 4.

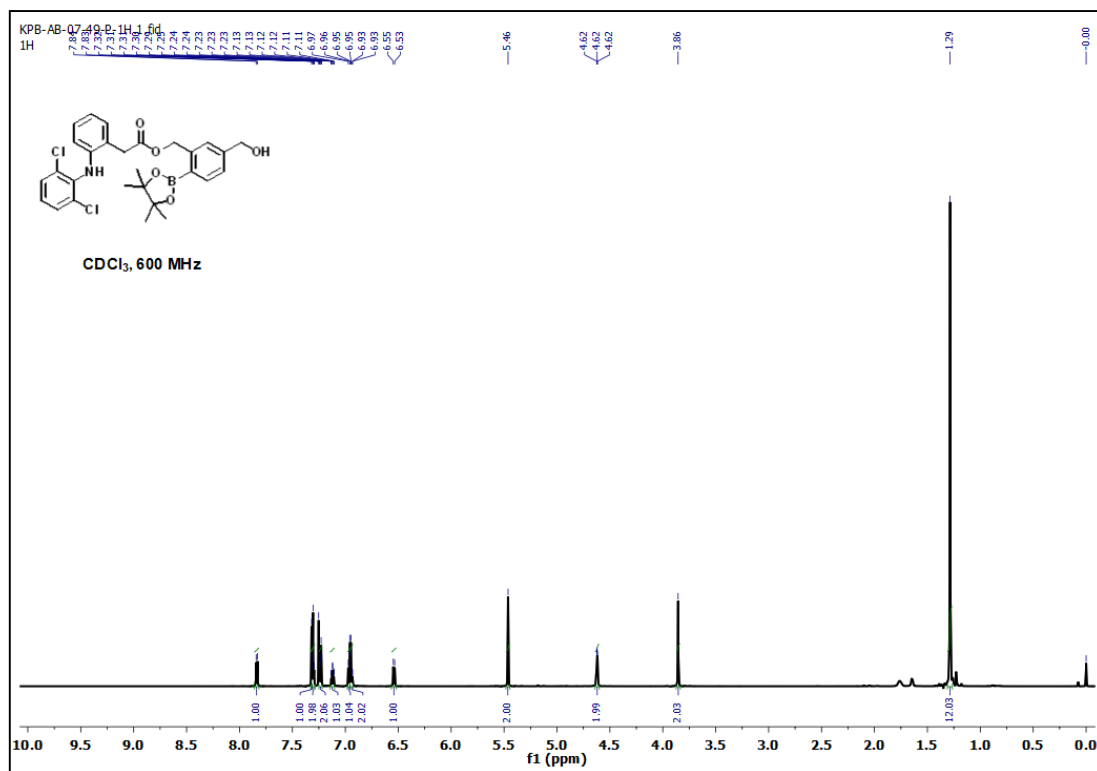

Figure S21. <sup>1</sup>H NMR spectrum (CDCl<sub>3</sub>, 600 MHz) of compound 5.

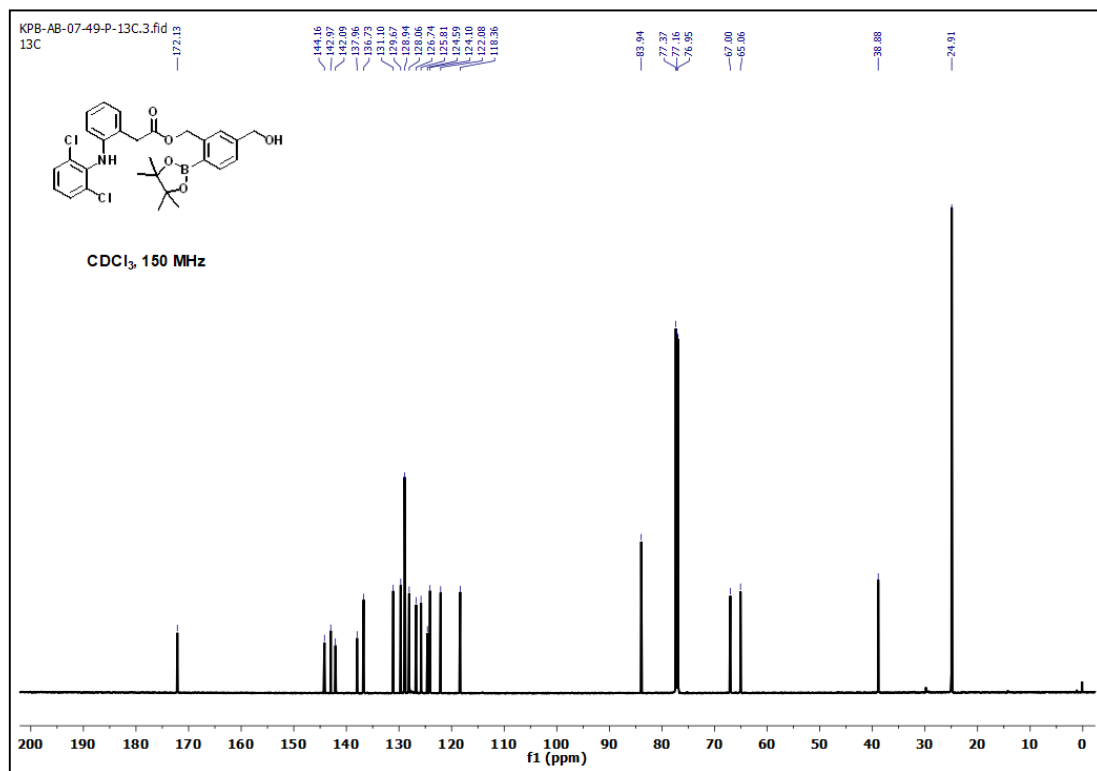

Figure S22. <sup>13</sup>C NMR spectrum (CDCl<sub>3</sub>, 150 MHz) of compound 5.



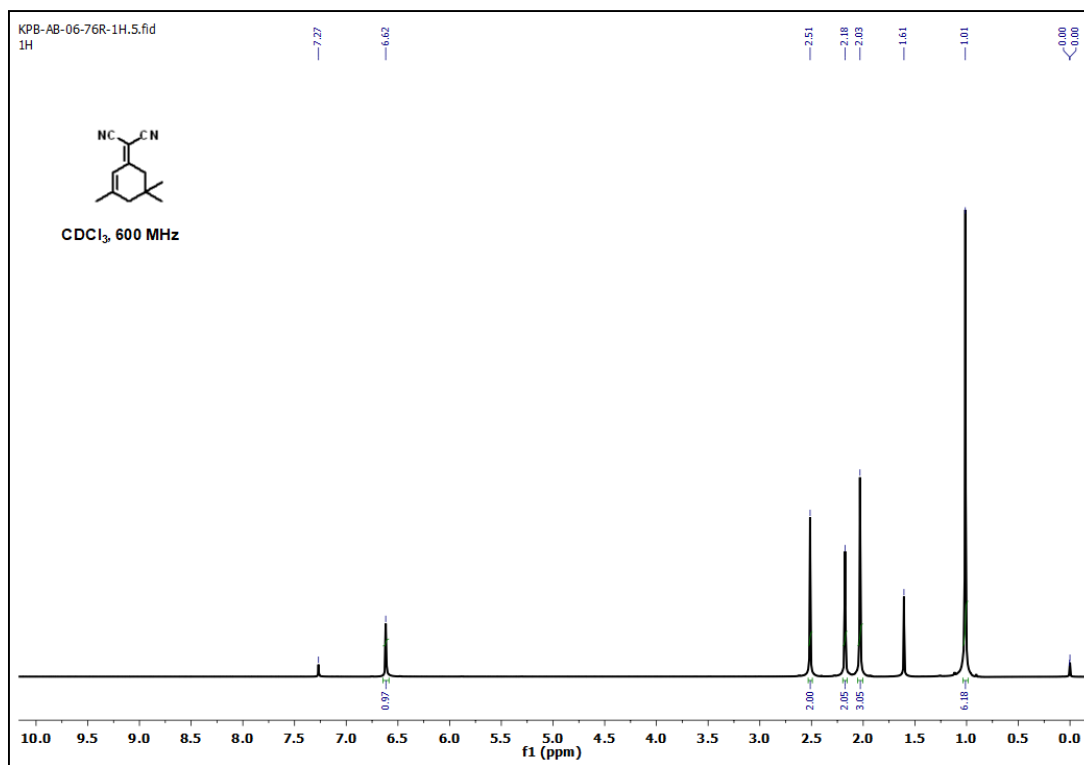

**Figure S23.** <sup>1</sup>H NMR spectrum (CDCl<sub>3</sub>, 600 MHz) of compound **7**.

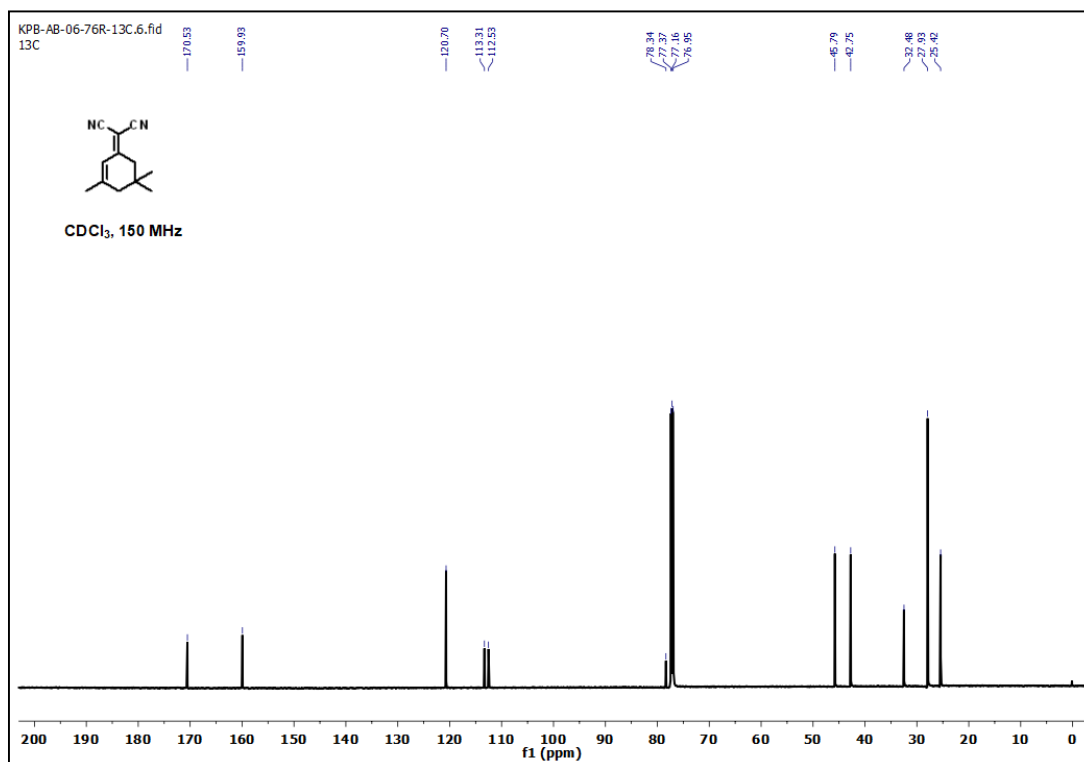

**Figure S24.** <sup>13</sup>C NMR spectrum (CDCl<sub>3</sub>, 150 MHz) of compound **7**.

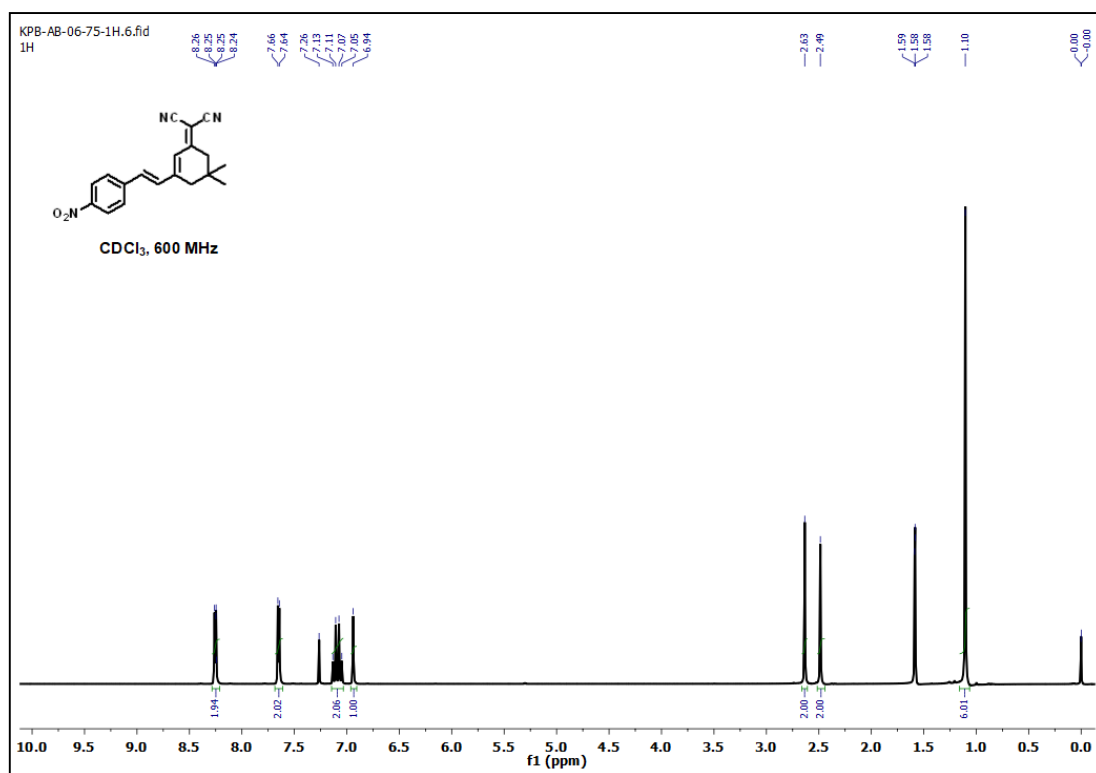

Figure S25. <sup>1</sup>H NMR spectrum (CDCl<sub>3</sub>, 600 MHz) of compound **8**.

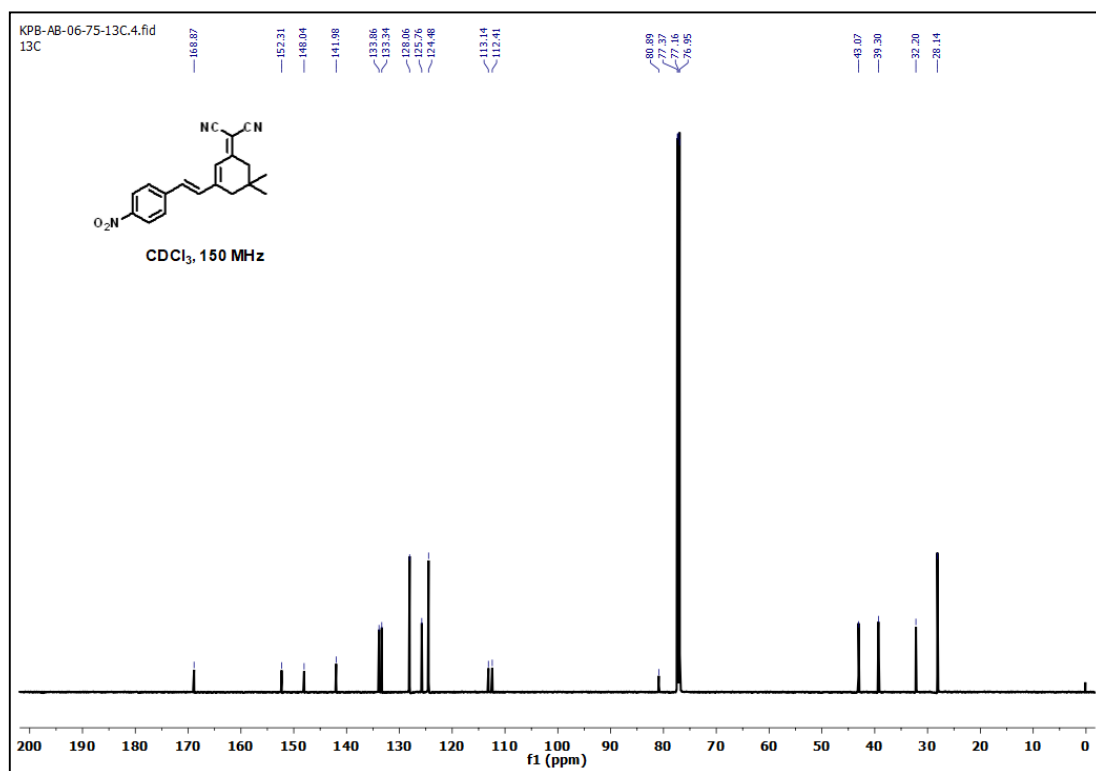

Figure S26. <sup>13</sup>C NMR spectrum (CDCl<sub>3</sub>, 150 MHz) of compound **8**.

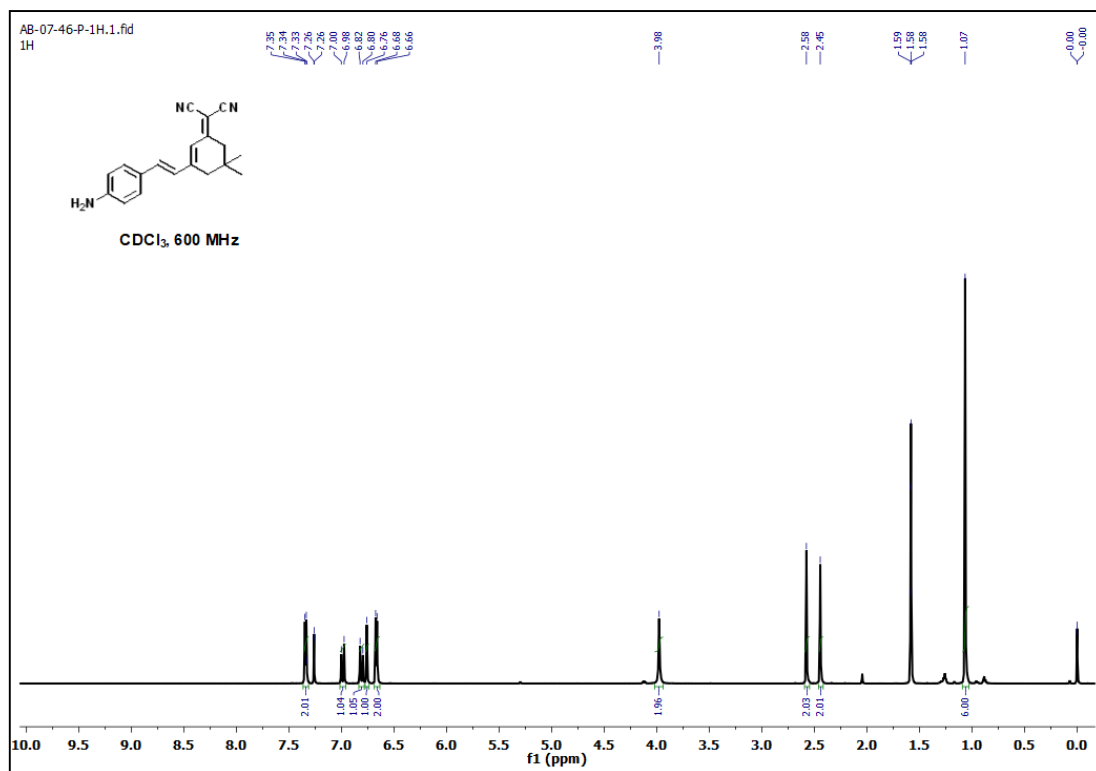

Figure S27. <sup>1</sup>H NMR spectrum (CDCl<sub>3</sub>, 600 MHz) of compound DCI-NH<sub>2</sub>.

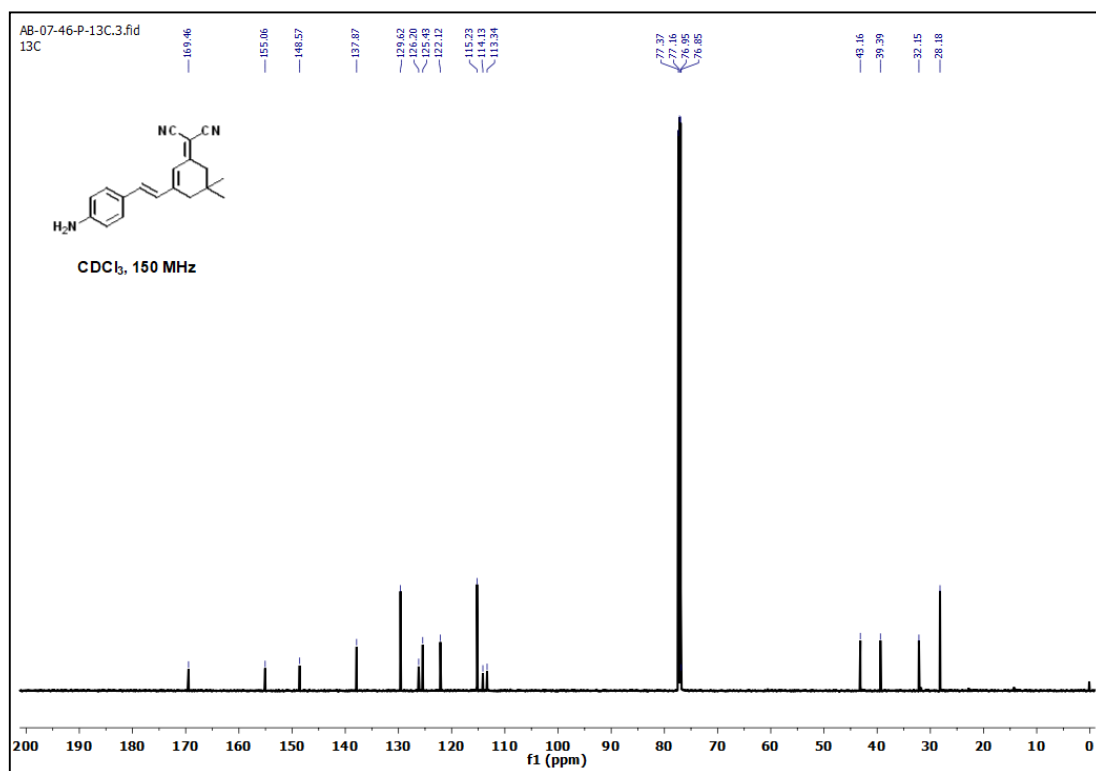

Figure S28. <sup>13</sup>C NMR spectrum (CDCl<sub>3</sub>, 150 MHz) of compound DCI-NH<sub>2</sub>.

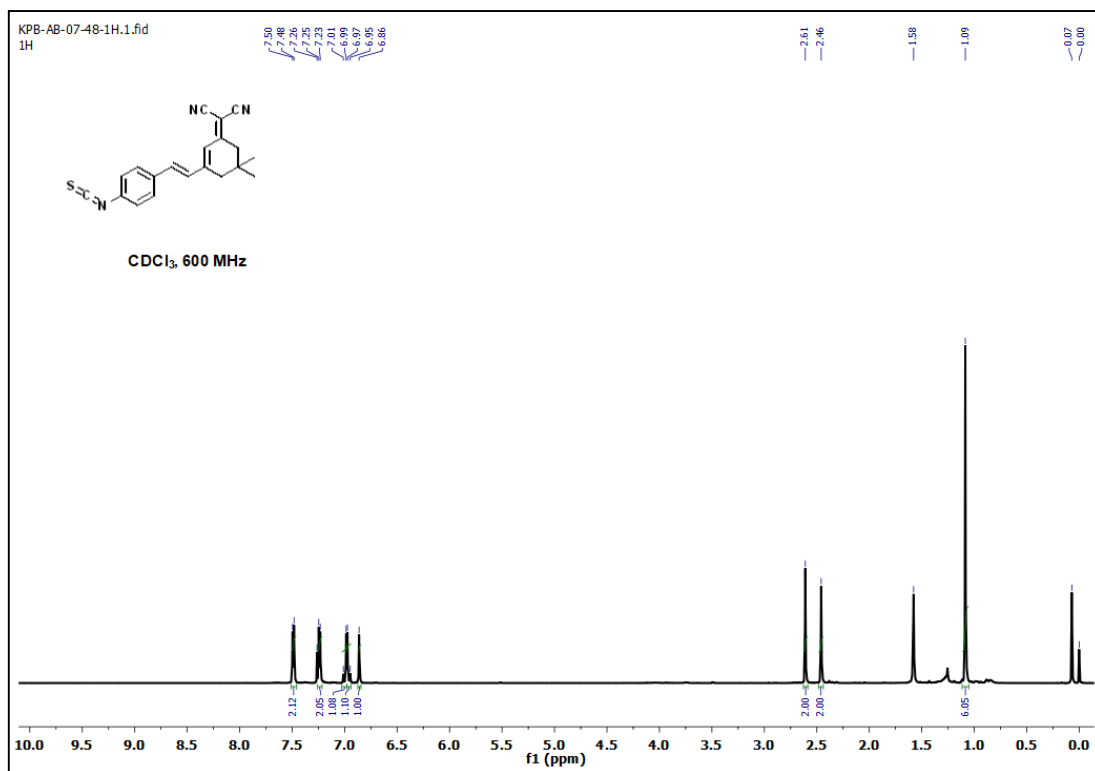

Figure S29. <sup>1</sup>H NMR spectrum (CDCl<sub>3</sub>, 600 MHz) of compound 9.

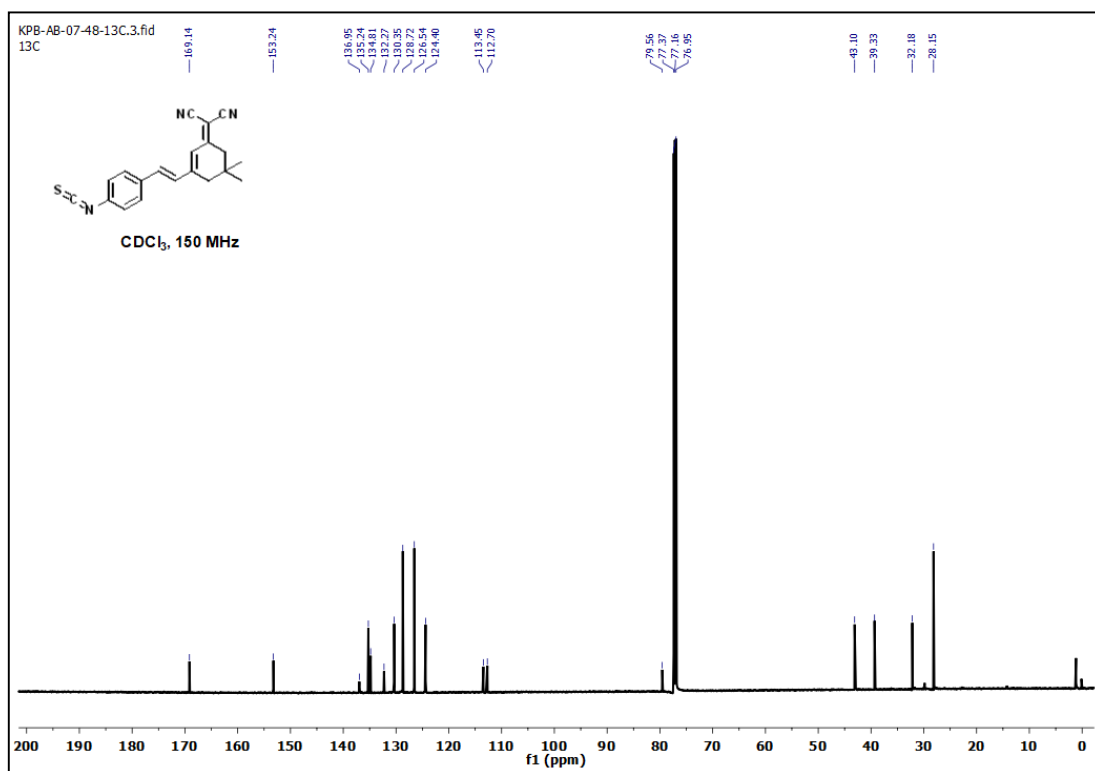

Figure S30. <sup>13</sup>C NMR spectrum (CDCl<sub>3</sub>, 150 MHz) of compound 9.

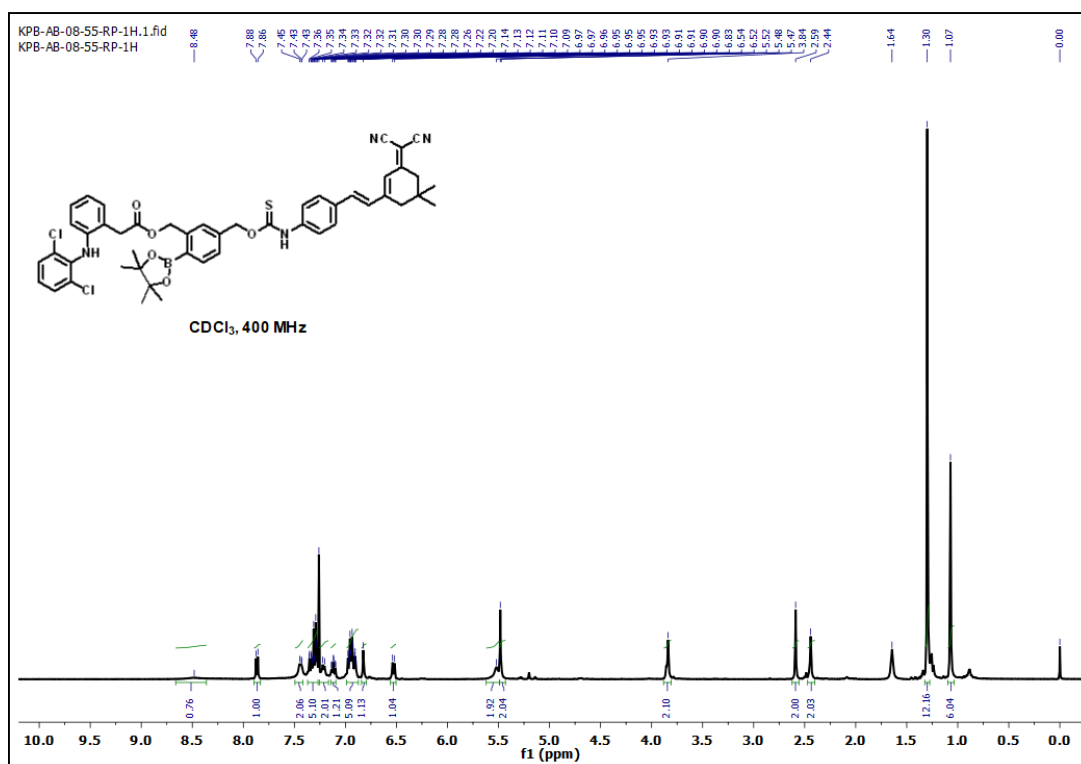

Figure S31. <sup>1</sup>H NMR spectrum (CDCl<sub>3</sub>, 400 MHz) of compound DCF-HS.

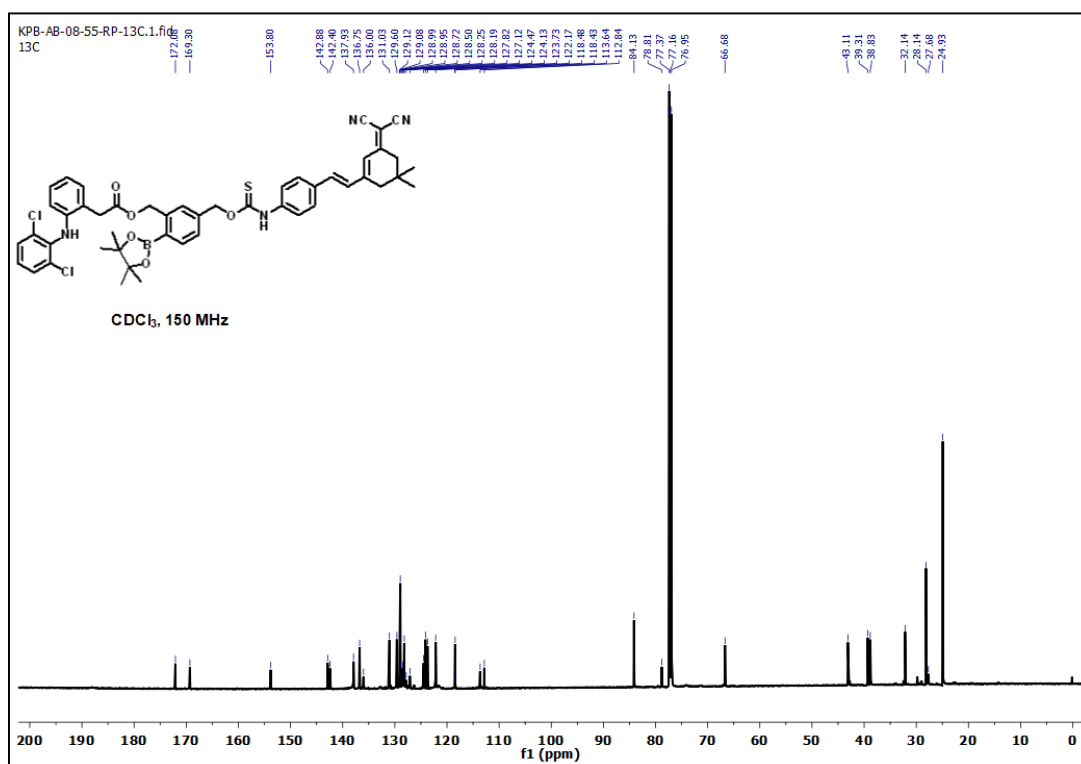

Figure S32. <sup>13</sup>C NMR spectrum (CDCl<sub>3</sub>, 150 MHz) of compound DCF-HS.

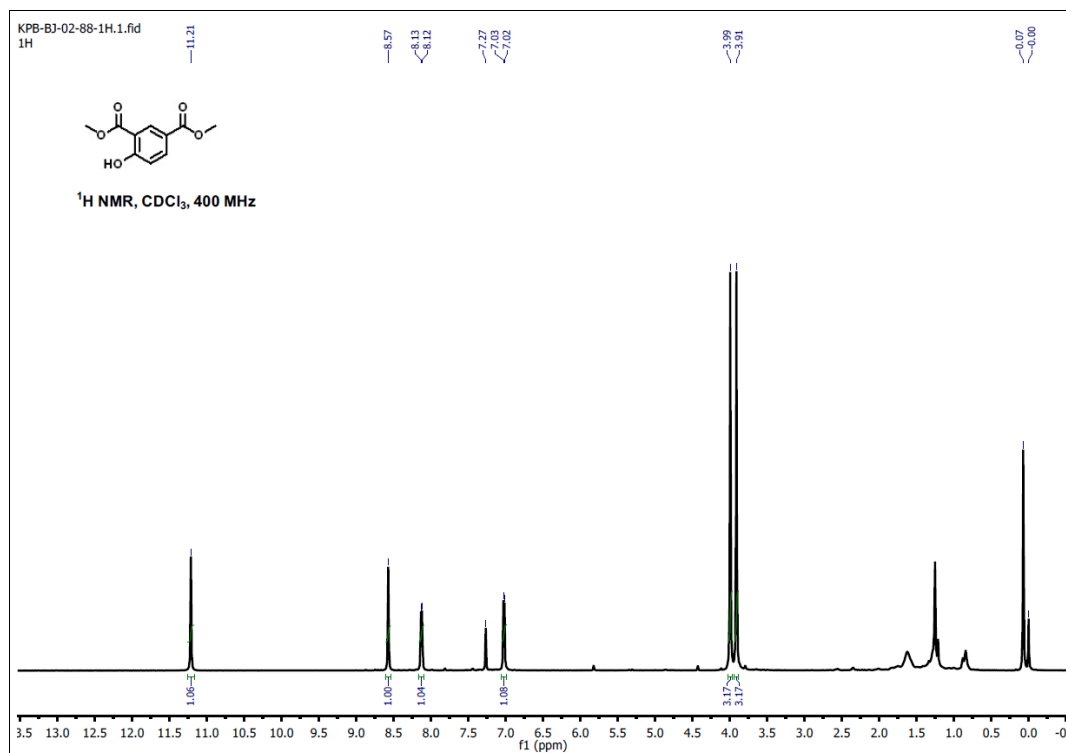

Figure S33. <sup>1</sup>H NMR spectrum (CDCl<sub>3</sub>, 400 MHz) of compound 15.

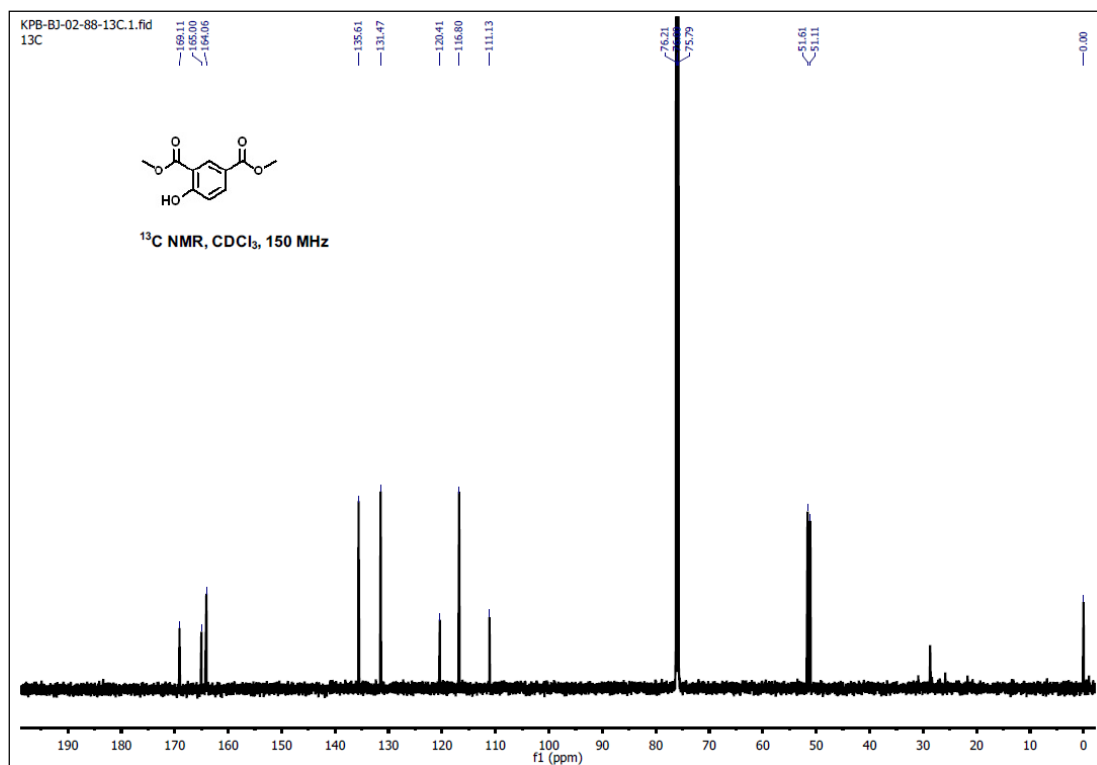

Figure S34. <sup>13</sup>C NMR spectrum (CDCl<sub>3</sub>, 150 MHz) of compound 15.

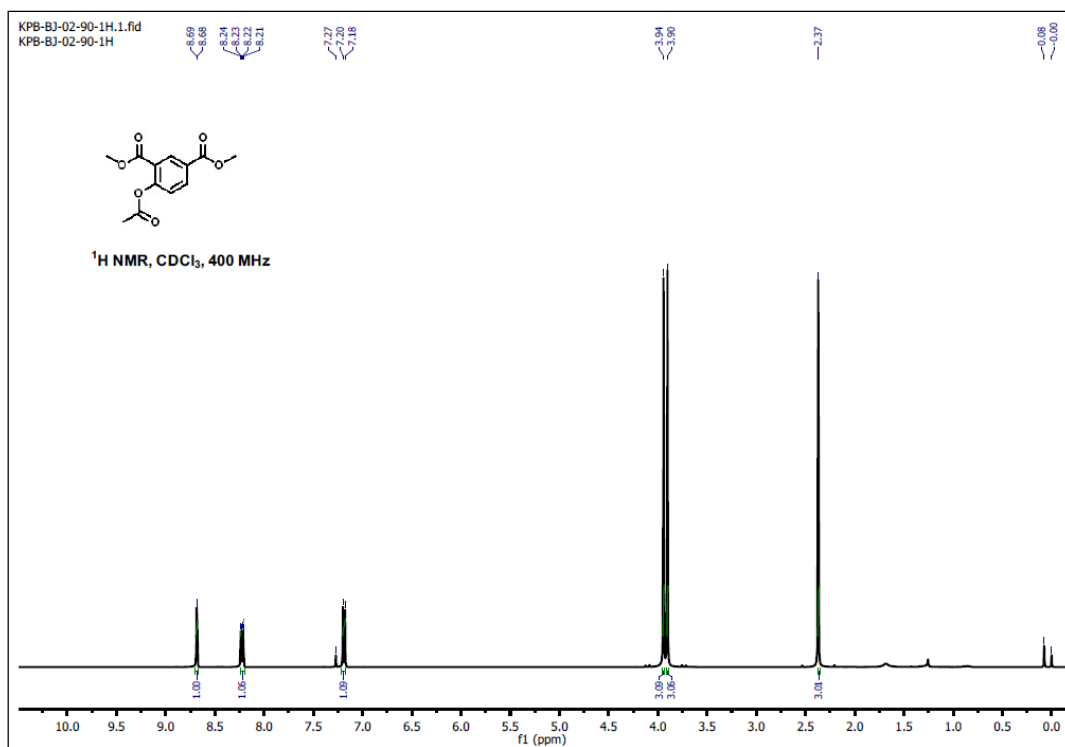

**Figure S35.** <sup>1</sup>H NMR spectrum (CDCl<sub>3</sub>, 400 MHz) of compound **16**.

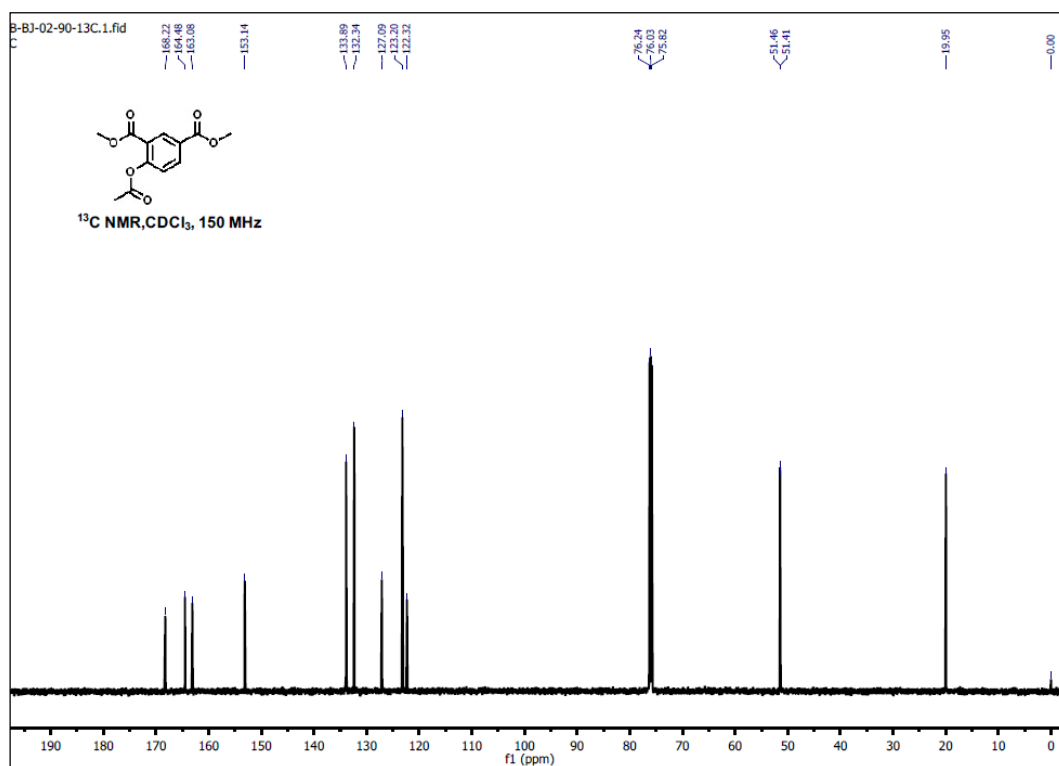

**Figure S36.** <sup>13</sup>C NMR spectrum (CDCl<sub>3</sub>, 150 MHz) of compound **16**.

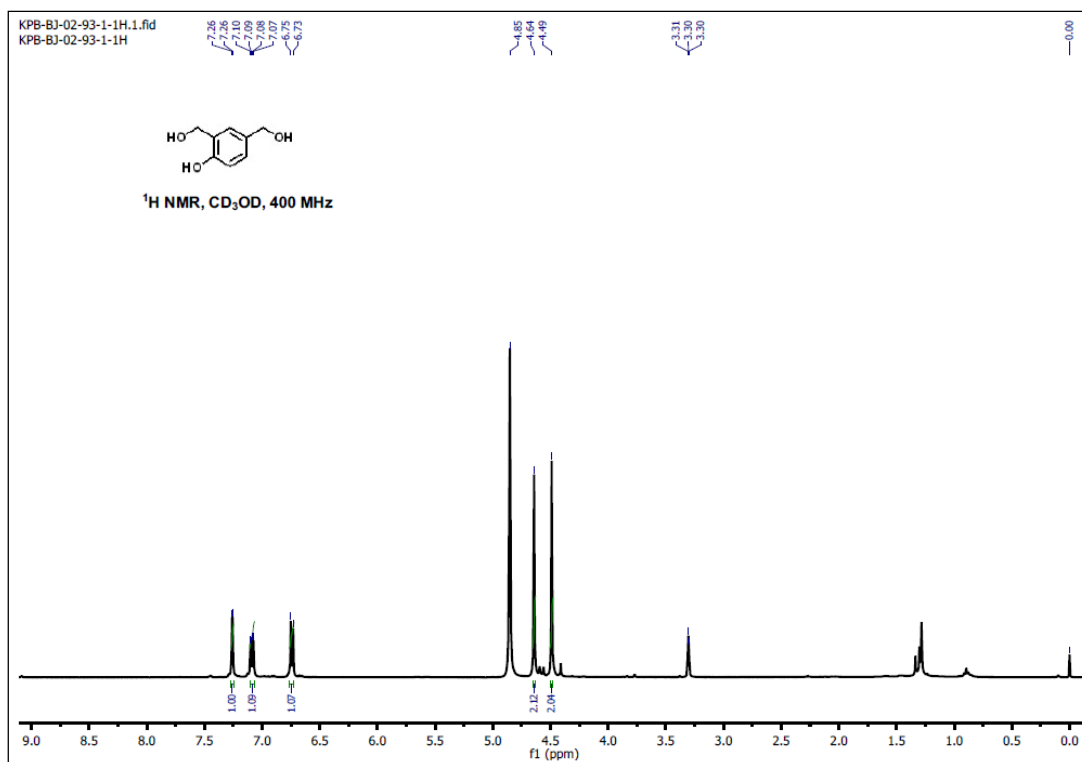

**Figure S37.** <sup>1</sup>H NMR spectrum (CD<sub>3</sub>OD, 400 MHz) of compound **13a**.

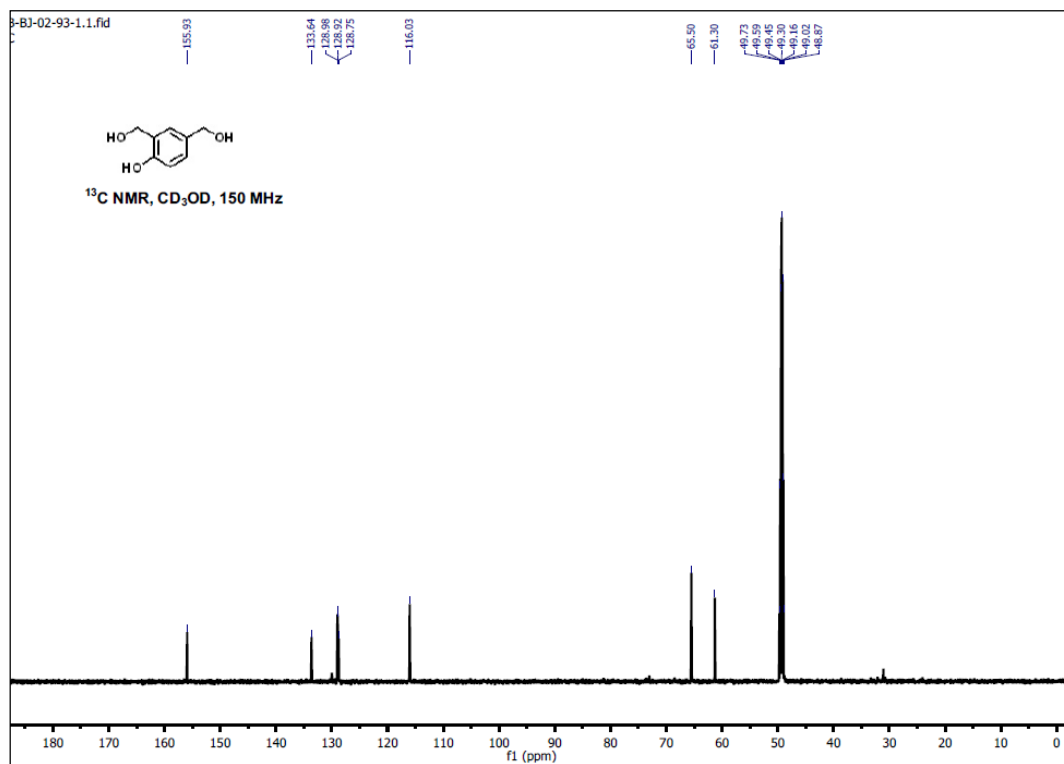

**Figure S38.** <sup>13</sup>C NMR spectrum (CD<sub>3</sub>OD, 150 MHz) of compound **13a**.



## References

1. J. H. Freeman, *J Am Chem Soc*, 1952, **74**, 6257-6260.
2. J. Rehbein, S. Leick and M. Hiersemann, *J Org Chem*, 2009, **74**, 1531-1540.
3. C. Ding, Y. Yu, Q. Yu, Z. Xie, Y. Zhou, J. Zhou, G. Liang and Z. Song, *ChemCatChem*, 2018, **10**, 5397-5401.
4. T. Fukuda, E. Matsumoto, S. Onogi and Y. Miura, *Bioconjugate Chem*, 2010, **21**, 1079-1086.
